# 1 Programmable transport of micro- and nanoparticles by *Paramecium* 2 *caudatum*

3 Richard Mayne<sup>a,\*</sup>, Jack Morgan<sup>b</sup>, Neil Phillips<sup>a</sup>, James Whiting<sup>a</sup>, Andy Adamatzky<sup>a</sup>

4 <sup>a</sup>*Unconventional Computing Laboratory, UWE, Bristol, BS16 1QY, United Kingdom*

5 <sup>b</sup>*Faculty of Health and Applied Sciences, UWE, Bristol, BS16 1QY, United Kingdom*

---

## 6 Abstract

We exploit chemo- and galvanotactic behaviour of *Paramecium caudatum* to design a hybrid device that allows for controlled uptake, transport and deposition of environmental micro- and nanoparticulates in an aqueous medium. Manipulation of these objects is specific, programmable and parallel. We demonstrate how device operation and output interpretation may be automated via a DIY low-cost fluorescence spectrometer, driven by a microprocessor board. The applications of the device presented range from collection and detoxification of environmental contaminants (e.g. nanoparticles), to micromixing, to natural expressions of computer logic.

7 *Keywords:* Ciliate, Parallel manipulation, Biocomputing, Bio-inspired, Unconventional Computing,  
8 Nanoparticle

---

9 The class of protistic freshwater organisms known as the ‘ciliates’ achieve locomotion, feeding and en-  
10 vironmental sensing via the functions of cell-surface organelles known as ‘motile cilia’ (hereafter ‘cilia’).  
11 Certain varieties of metazoan epithelia, such as the columnar epithelium found in the upper respiratory  
12 tract or fallopian tubes of humans, also possess cilia. A ciliated cell may possess thousands of these hair-like  
13 organelles which achieve their purposes via a rhythmic whip-like beating motion, which creates fluid cur-  
14 rents in surrounding fluid media. The emergent properties exhibited by collective ciliary motion, which are  
15 thought to be coordinated solely by local interactions [1, 2, 3, 4, 5, 6, 7, 8, 9, 10], have long-since been the  
16 focus of research for harnessing, mimicking and emulating for a range of biomedical and engineering uses  
17 [11, 12, 13, 14, 15, 16, 17, 18, 19, 20, 21, 22].

18 Artificial cilia arrays have been considered in the context of self-cleaning or anti-fouling surfaces; following  
19 these lines of thought we developed a concept of programmable intake and transport of micro-objects by  
20 cilia arrays inspired by the ciliate *Paramecium caudatum*. Such arrays were capable of orientation and  
21 transportation of various geometrical shapes [23, 24] or objects [25]. Computer models on this concept have  
22 been partially confirmed in laboratory experiments [26]. Although manipulating single micro-particles on  
23 the surface of a live ciliate is an experimentally challenging task, we anticipate value in the prospect of large  
24 scale transfer of volumes of micro-particles via controlled intake of the particle by ciliates, movement of the  
25 ciliates with particle, and programmable release of the particles.

26 Previously we proposed and studied in experimental laboratory conditions transfer of substances with  
27 slime mould [27], where the slime mould was stimulated to intake food colouring and propagate along the  
28 route determined by spatial configurations of sources of attractants and repellents. We adopt similar  
29 strategy in our experiments with *P. caudatum* with the following objectives:

- 30 1. Collection of micro-scale objects from specific locations by the organisms via internalisation and in-  
31 tracellular carriage, ideally with some form of discrimination between objects.

---

\*Corresponding author

*Email addresses:* [Richard.Mayne@uwe.ac.uk](mailto:Richard.Mayne@uwe.ac.uk) (Richard Mayne), [Jack3.Morgan@live.uwe.ac.uk](mailto:Jack3.Morgan@live.uwe.ac.uk) (Jack Morgan),  
[Neil.Phillips@uwe.ac.uk](mailto:Neil.Phillips@uwe.ac.uk) (Neil Phillips), [James.Whiting@uwe.ac.uk](mailto:James.Whiting@uwe.ac.uk) (James Whiting), [Andrew.Adamatzky@uwe.ac.uk](mailto:Andrew.Adamatzky@uwe.ac.uk) (Andy Adamatzky)

- 32 2. Object transport to specific areas.
- 33 3. Flexible transport (dynamic reprogrammability of specific operations).
- 34 4. Controlled retention and deposition of ingested material.
- 35 5. Parallelism and multitasking (manipulation of multiple varieties of object and ability to perform a
- 36 range of operations).
- 37 6. Modular construction and scalability.

38 Although the capabilities of *P. caudatum* regarding their interactions with various particulates was  
39 covered thoroughly in historical literature [28, 29, 30], it was not until recently that these organisms have  
40 been characterised as doing useful ‘work’ in terms more amenable to quantitative descriptions. In our  
41 previous work, we have described *P. caudatum* interactions with environmentally-dispersed particulates as  
42 sorting (differential manipulation based on sensorial input) operations [26] and orchestrated (by humans)  
43 transport of environmental contaminants [31], as per criterion 1 in the above list.

## 44 1. Methods

### 45 1.1. *P. caudatum* culture

46 *P. caudatum* were cultivated in a modified Chalkley’s medium enriched with 10 g of dried alfalfa and  
47 40 grains of wheat per litre at room temperature in non-sterile conditions. Cultures were exposed to a day  
48 and night cycle but were kept out of direct sunlight. Organisms were harvested in log growth phase by  
49 centrifugation at 400×G prior to being rinsed and resuspended in dechlorinated tap water (DTW).

### 50 1.2. Experimental environment

51 The standard experimental environment (EE) (Fig. 1) used consisted of two polyethylene cuvettes  
52 measuring 12 × 12 × 44 mm, affixed to the base of a glass microscope slide with epoxy resin (Araldite,  
53 Huntsman, USA). The tubes were linked at a point 1.5 mm above their base by flexible PTFE tubing, OD  
54 3.0 mm ID 1.0 mm length 5 mm, which were affixed to the cuvettes with epoxy. The length of the connecting  
55 tube was chosen to be short enough to reduce operation time and make the rate of diffusion proportional to  
56 the length of each experiment (see Appendix A.2). Prior to each experiment, both chambers (A, B) were  
57 filled with 2.0 ml of fresh culture medium. Care was taken to ensure that fluid levels were equal in both  
58 cuvettes and that the linking tube did not become air-locked. Whenever quantities of fluid containing cells  
59 or particles were added to a chamber, an equal quantity of fluid (DTW unless otherwise stated) was added  
60 to the other chamber simultaneously in order to prevent fluid transfer resulting from pressure changes.

61 Initial control experiments designed to determine the rate of transfer of both inanimate microparticulates  
62 and *P. caudatum* cells between each chamber were designed as follows. For *P. caudatum* experiments,  
63 approximately 25 cells were transferred to chamber A in 100 µl of DTW. The EEs were placed on the stage  
64 of a stereomicroscope which was focused on chamber B. The sample was kept static for the duration of the  
65 experiment and was observed regularly every 4–6 hours. The microscope’s halogen lamp was switched off in  
66 between observations and the entire setup was exposed to a day/night cycle whilst being kept out of direct  
67 sunlight.

68 Experiments examining particulate diffusion were conducted as above but the EEs had a concentrated  
69 amount of exogenous particles added to chamber A rather than cells. Two varieties of particulate were  
70 added:

- 71 • 2.0 µm diameter carboxylate-modified latex microspheres labelled with fluorescein (Sigma Aldrich,  
72 Germany) (hereafter, FLPs, ‘fluorescent latex particles’). 100 µl of stock solution (2.5% solids, approx.  
73  $7.2 \times 10^9$  particles per ml) was added to give a total concentration for chamber A of 0.125% solids w/v  
74 (approx.  $7.20 \times 10^8$  particles).
- 75 • 200 nm diameter multi-core magnetite (iron II/III oxide) nanoparticles, prepared with a hydrody-  
76 namic starch coating (Chemicell, Germany) (hereafter, MNPs, ‘magnetite nanoparticles’). 100 µl of  
77 stock solution (25 mg/ml) was added to give a total concentration for chamber A of 1.25 mg/ml  
78 (approximately  $2.75 \times 10^{11}$  particles).

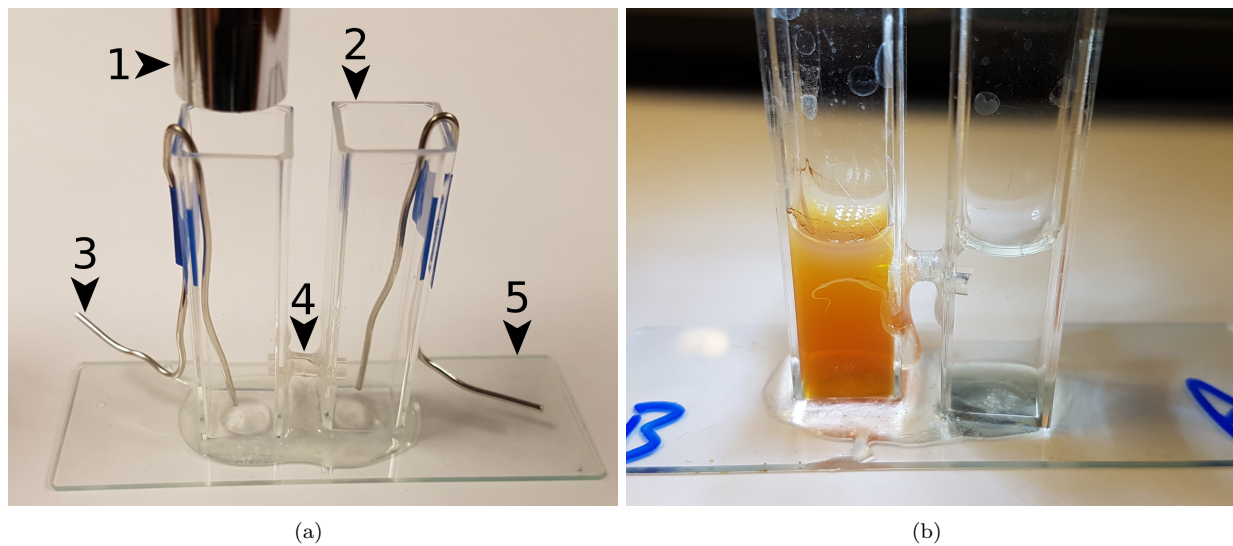

Figure 1: Photographs of the experimental environment. (a) Showing principle and optional components. (1) Microscope, optional. (2) Cuvette. (3) Pt electrode, optional. (4) Link tube. (5) Base, glass microscope slide (75×25 mm). (b) Chemotaxis experiment, t=6 h. Chamber B is filled with a MNP suspension (rusty discolouration). *P. caudatum* cells were microscopically observed to have migrated from chamber A→B.

79 These two varieties of particulate were chosen for these and consequent experiments as our previous work  
80 has demonstrated that *P. caudatum* will favourably ingest them whilst suffering no apparent deleterious  
81 health effects [31, 26]. Samples were taken every 4–6 hours by simultaneously drawing 10  $\mu\text{l}$  of fluid from  
82 both chambers and examining the sample from chamber B with a Zeiss Axiovert 200M inverted microscope;  
83 samples were checked at 200 $\times$  magnification with fluorescence microscopy in the case of the FLPs and 600–  
84 1000 $\times$  using phase contrast optics for the MNPs. Although the particle size of the MNPs was beyond the  
85 resolution of the light microscope, they are known to flocculate into micro-scale quantities in the presence of  
86 salts. A magnet was also held close to the edge of the droplet in order to observe contrails and discolouration  
87 in the fluid due to the movement and concentration of magnetite in areas closer to the magnet.

### 88 1.3. Controlled transport of particulates

89 Two methods of controlling *P. caudatum* migration between the two chambers were investigated, one  
90 via attraction and the other repulsion.

#### 91 1.3.1. Chemoattraction

92 Firstly, attraction of *P. caudatum* between chambers was investigated by simultaneously transferring  
93 approximately 25 cells into chamber A in 100  $\mu\text{l}$  of DTW and the same volume of one of three varieties of *P.*  
94 *caudatum* ‘food’ into chamber B. Thus the hypothesis that *P. caudatum* cells would migrate from chamber  
95 A to B, guided by a chemoattractant gradient (chemotaxis). The three varieties of food were as follows:

- 96 1. *Saccharomyces cerevisiae* (yeast). Yeast were cultured from approximately 20 grains (0.1 g) of freeze  
97 dried, commercially-available bread yeast (Allinson, UK) in 10 ml of DTW containing 0.1 g of glucose  
98 in an incubator at 22°C, for 1 hour. The cultures were then transferred into boiling tubes and placed  
99 in a 100°C water bath for 15 minutes. A few drops of 40% Congo red dye dissolved in ethanol were  
100 added before cultures were reserved in a refrigerator until use.
- 101 2. FLPs, 100  $\mu\text{l}$  of stock solution to bring total concentration to 0.125% (w/v), approx.  $7.20 \times 10^8$   
102 particles.
- 103 3. MNPs, 100  $\mu\text{l}$  of stock solution to bring total concentration to 1.25 mg/ml, approx.  $2.75 \times 10^{11}$  particles.

104 Chemotaxis experiments were performed in a similar manner to those described in section 1.2: the EE  
105 was placed onto a stereomicroscope stage and the was observed at a position over chamber B once per hour  
106 for the presence of *P. caudatum* cells. When cells were found to have migrated to chamber B, samples were  
107 taken by drawing off the cuvette's fluid and adding it to an equal quantity of 4% paraformaldehyde in pH  
108 7.2 phosphate buffered saline (PBS). Individual *P. caudatum* cells were isolated under a stereomicroscope,  
109 transferred to a cavity slide on the inverted microscope and checked optically for red-stained yeast or MNPs,  
110 or for FLPs with fluorescence.

111 A further experiment was designed in order to assess whether multiple varieties of particulate could be  
112 collected by *P. caudatum* cells, towards describing their ability to perform parallel manipulation. Another  
113 set of chemotaxis experiments was conducted where 100  $\mu$ l of a 50:50 mixture of stock (see above) FLPs  
114 and MNPs were added to chamber B; following the successful migration of cells to chamber B, they were  
115 checked for the presence of both varieties of particle.

### 116 1.3.2. Galvanorepulsion

117 Repulsion experiments were performed through the use of a DC electrical field, along the hypothesis  
118 that *P. caudatum* migrates towards the cathode in a system where a small electrical current is injected  
119 (galvanotaxis) [32]. Two 90 $\times$ 1.0 mm platinum electrodes were inserted into the EE and connected to a  
120 benchtop DC power supply providing 18 V at a maximum current of 0.3 A. Circa 25 *P. caudatum* cells  
121 were introduced into chamber A of the EE, along with the anode, in 100  $\mu$ l of DTW. The cells were  
122 allowed 5 minutes to acclimatise to their new environment before the power supply was switched on. The  
123 experiments were observed continuously using a stereomicroscope and recorded using a Brunel Eyecam  
124 (Brunel Microscopy, UK). Experiments were repeated 5 times for each chamber being observed (i.e. 5 at A,  
125 5 at B).

### 126 1.4. Controlled retention and deposition

#### 127 1.4.1. Retention

128 Retainment of particulate cargoes over the duration of EE experiments was investigated by transferring  
129 5  $\mu$ l of concentrated *P. caudatum* culture to a clean culture vessel containing 0.015% w/v solution of FLPs  
130 (approx.  $5.4 \times 10^7$  particles). Cells were left for 1 hour before being manually removed with a micropipette  
131 and placed in 5  $\mu$ l of fresh media. This was achieved by transferring 200  $\mu$ l of the original culture media to a  
132 large cavity microscope slide containing a drop of quieting solution (1% methyl cellulose), which slowed the  
133 organisms' migration sufficiently to manually collect them in 2.5  $\mu$ l of media using a micropipette. This step  
134 was essential in order to ensure that no extracellular particulates were transferred into the fresh medium.  
135 Five cultures were run in parallel such that one could be examined each hour for 4 hours and the final one  
136 was examined after 24 hours: examination included pipetting the entire volume onto a series of microscope  
137 slides and observing for exogenous FLPs under fluorescence optics. Each set of retention experiments were  
138 run in triplicate.

#### 139 1.4.2. Deposition

140 The following 'deposition' experiments were designed to demonstrate the principle that *P. caudatum* cells  
141 loaded with exogenous particles could be made to cease all movement (transport operations) after a specific  
142 point using a simple and effective method, which led to the deposition of their cargoes in a predictable  
143 manner. This was achieved by transferring *P. caudatum* cells containing FLPs, which were prepared in  
144 the same manner as in the aforementioned 'retention' experiments, to chamber A in an EE. 200  $\mu$ l of 4%  
145 paraformaldehyde in PBS was added to chamber A in order to fix all of the resident cells, whilst 200  $\mu$ l of  
146 DTW was added to chamber B. Both a stereomicroscope and fluorescence inverted microscope were used  
147 to observe the distribution of fixed cells in chamber A, after which the fluid was carefully drawn off and  
148 observed as per the 'retention' experiments for evidence of extracellular FLPs. Experiments were repeated  
149 in triplicate.

### 150 1.5. Programmability

151 ‘Programming’ of EEs with multiple input types was investigated via a chemoattraction operation fol-  
152 lowed by galvanorepulsion. Approximately 650 *P. caudatum* cells in 200  $\mu\text{l}$  of DTW were placed into  
153 chamber A and a corresponding volume of a particulate solution (100  $\mu\text{l}$  of both MNPs and FLPs at stock  
154 concentration) was delivered into chamber B simultaneously: the experiment was run as per the chemotaxis  
155 experiments in section 1.3.1, with the exception that a platinum cathode was placed in chamber A and an  
156 anode in chamber B, as per section 1.3.2. After 6 hours had elapsed and cells had been positively iden-  
157 tified as being present in chamber B with a stereomicroscope, the electrodes’ power supply was switched  
158 on. Videomicrography was started at the point in the experiments where the electrodes were turned on.  
159 Experiments were repeated 10 times.

### 160 1.6. Automation

161 The principle of detection of FLPs via fluorescence spectroscopy was chosen to be the simplest and lowest  
162 cost method for detecting the completion of a transport operation. A fluorescence spectrometer designed  
163 to articulate onto a single EE chamber was designed as follows (see Supplementary Information 3 for parts  
164 list).

165 The light source used was a single surface mount 485nm light emitting diode (LED) that produced  
166 479 Lux. The LED was mounted to a custom board with a large aluminium heat-spreader, onto which a 15°  
167 collimator lens was affixed in order to focus the light produced. The LED was driven by a benchtop power  
168 supply at 3.1 V and 250 mA, switched via a relay controlled by an Arduino Uno microprocessor board based  
169 on the ATmega328 platform (Arduino, Italy) (microprocessor code is included in Supplementary Information  
170 2). The LED board and lens assembly was mounted to an EE cuvette via a slip-on 3D printed adapter (Fig.  
171 2a), which was generated in OpenSCAD on an open source template [33]. The adapter, which fit snugly  
172 around three sides of the cuvette (Fig. 2b), also served to mount two filters and a light dependent resistor  
173 (LDR) at a 90° angle to the light path (Fig. 2d–e). The filters used were an excitation bandpass filter (i.e.  
174 between the light source and sample) and an emission notch filter (between sample and detector); inspired  
175 by Ref. [34], we used low-cost photography lighting gels as filters.

176 The light intensity was measured by the LDR, using a voltage divider with a resistor (10 k $\Omega$  in this  
177 instance), with the output of the voltage divider read by an analogue pin on the Arduino microcontroller.  
178 The on-board 10-bit ADC converted the analogue signal into a digital value which was sent to the PC via  
179 serial monitor USB link. The system is illustrated in Fig. 2; (c) system schematic, (f) wiring diagram, (g)  
180 partially-assembled.

181 The operation cycle of the spectrometer was as follows: the LED is switched on for 1 second and the LDR  
182 value is read and printed on-screen. The LED then switches off for 1 second and the LDR value is printed  
183 again. The first number returned gives the relative sensor value, indicating the quantity of fluorescent  
184 compound in the sample. The second number indicates a reference value as an internal control for each  
185 reading.

186 The spectrometer was always operated inside an opaque box in order to eliminate interference by ambient  
187 light. Initial device evaluation was performed on graduated series of FLPs, inside a single cuvette.

188 Further experiments were performed with the spectrometer *in situ* on chamber A of EEs following  
189 experiments identical to those detailed in section 1.5, with the exceptions that only FLPs were added  
190 (200  $\mu\text{l}$  of stock solution), cells were only exposed to the particles for an hour and a range of cell densities  
191 was investigated. The rationale behind this experiment was that the spectrometer would detect when cells  
192 had returned to chamber A following being ‘programmed’ to return there after internalising a quantity of  
193 FLPs. The spectrometer was used 5 minutes following the application of the DC field. A small number of  
194 cells from each experiment were withdrawn, fixed and imaged in order to estimate the average number of  
195 FLPs within each cell.

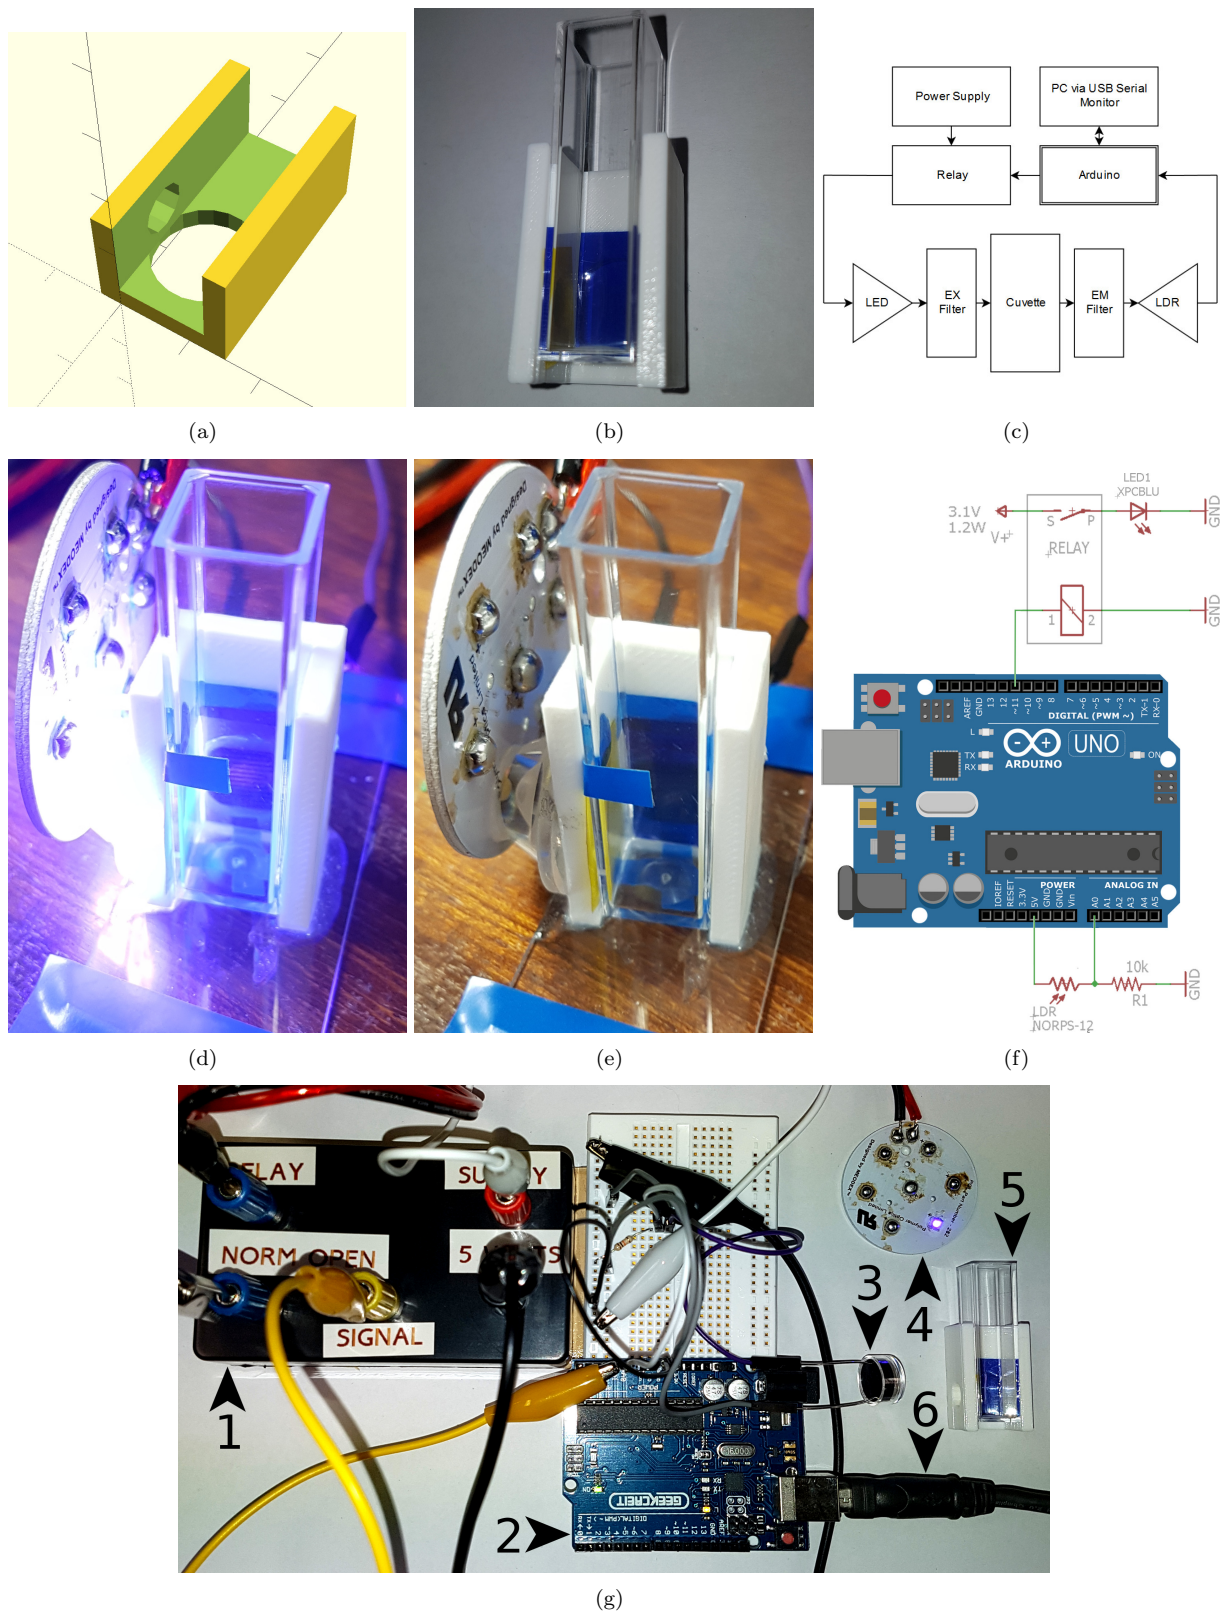

Figure 2: EE fluorescence spectrometer. (a) 3D printed cuvette adaptor. (b) Photograph of cuvette adaptor with filters and cuvette *in situ*. (c) System diagram. (d-e) Photographs of assembled LED with heatsink, LDR (rear), collimator, adaptor and cuvette, with and without LED illumination. (f) Wiring diagram. (g) Partially assembled spectrometer system, where (1) relay, (2) Arduino, (3) LDR, (4) LED, (5) cuvette, filters and adaptor, (6) USB connection.

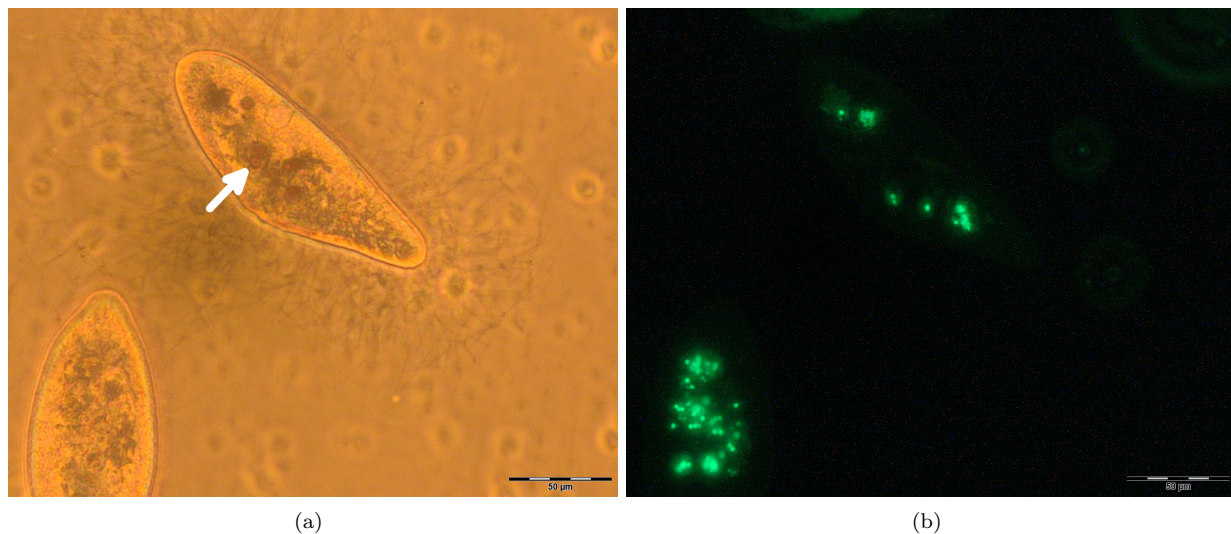

Figure 3: Photomicrographs to show fixed *P. caudatum* cells following exposure to a 50:50 mixture of FLPs and MNPs. (a) Brightfield. Rust-coloured intracellular inclusions indicative of magnetite clusters are present (arrowed). (b) Fluorescence. Fluorescent intracellular objects consistent with the FLPs are also present.

## 196 2. Results

### 197 2.1. Suitability of experimental environment

198 In initial control experiments, it was found that the organisms did not migrate to chamber B within, at  
199 minimum, the first 24 hours of observation. Even so, only a few of the 25 initial *P. caudatum* cells were  
200 observed in chamber B after 48 hours in all experiments (maximum 4).

201 No FLPs or MNPs were observed to have diffused to chamber B over the 48 hour experiments, presumably  
202 due to both varieties of particle not diffusing as a product of their size and/or density. Data from these  
203 experiments are shown in Supplementary Information, section Appendix A.3.

### 204 2.2. Controlled transport

#### 205 2.2.1. Chemoattraction

206 *P. caudatum* cells were observed to migrate from chamber A→B in shorter time scales than control  
207 experiments when guided by all three attractants. The average time for the organisms to migrate to the  
208 supplied attractants were: yeast 1.6 h, FLPs 5.4 h, MNPs 1.8 h (Fig. 1b), FLPs and MNPs 1.8 h (see  
209 Appendix A.4 for dataset). On microscopic examination of fixed cells recovered from chamber B after  
210 24 hours of exposure to each attractant source, all three varieties of particle could be distinguished in the  
211 cells' cytoplasm. Results therefore suggest that all varieties of particulate are effective chemoattractants.  
212 Furthermore, cells that were exposed to FLPs and MNPs simultaneously were observed to have ingested  
213 quantities of both (Fig. 3), indicating the *P. caudatum* may be loaded with multiple particle types for  
214 parallel operations

#### 215 2.2.2. Galvanorepulsion

216 *P. caudatum* cells were observed to respond to the application of a DC field by immediately altering their  
217 swimming direction towards the cathode in chamber B (Fig. 4, Supplementary Information File: SI Movie  
218 1). Despite their rapid response, the cells required up to 5 minutes of constant stimulation to evacuate their  
219 chamber due to their slow speed relative to the dimensions of the EE and their directional migration being  
220 vague, i.e. cells would frequently collide with the walls of the cuvette and the sides of the connecting tube  
221 several times before finding the correct path. There was frequently a small number (range 0–4) of cells that  
222 did not move towards the cathode within the 5 minutes time frame and occasionally a few cells would stay  
223 in the connecting tube rather than emerge into chamber B.

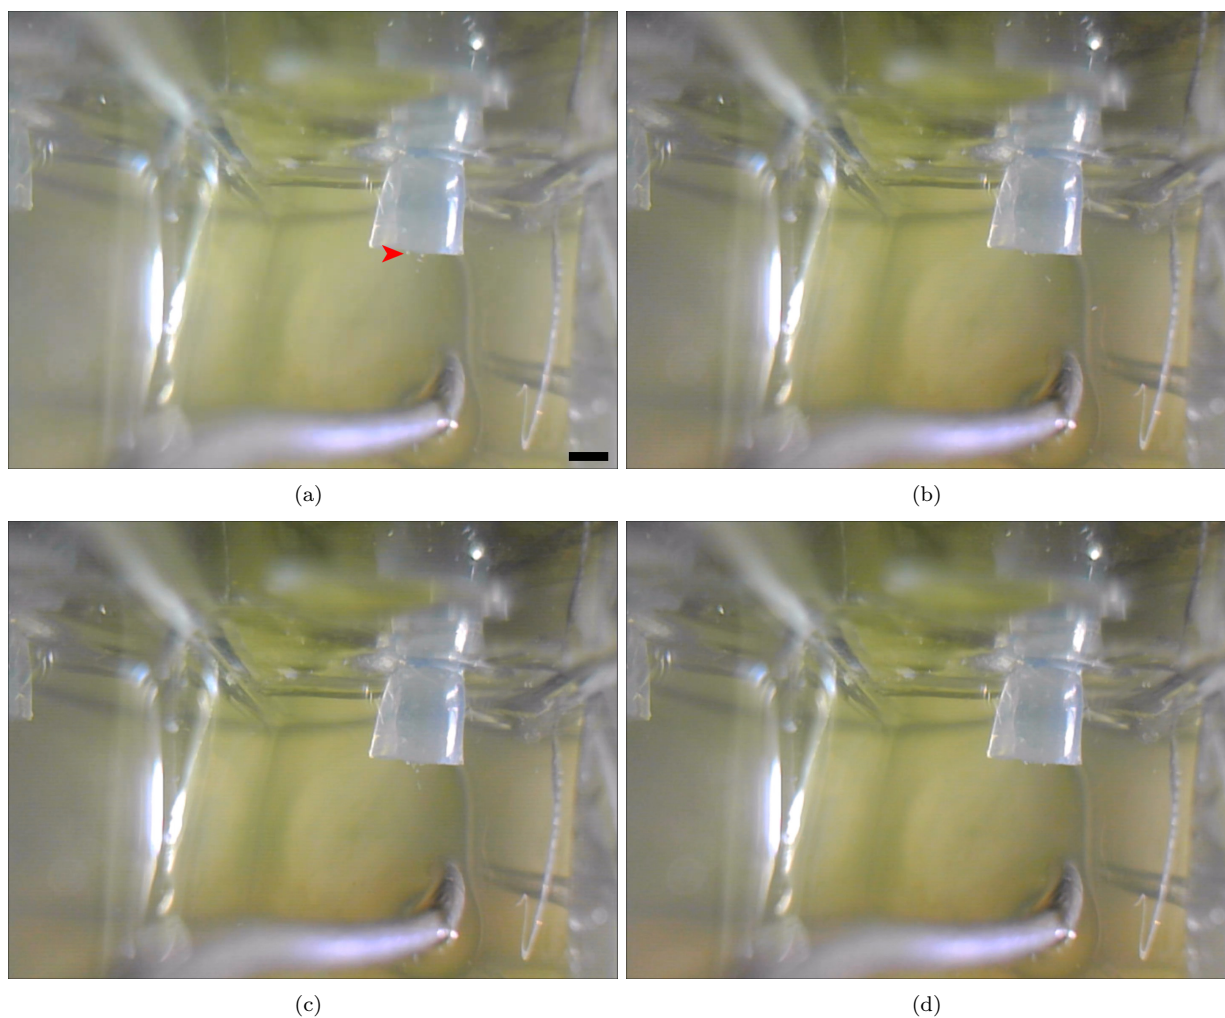

Figure 4: Stereomicrographs to demonstrate the movement of *P. caudatum* cells away from a live anode (silver object in bottom central third of images). Several cells (cluster arrowed in [a]) can be seen swimming towards, then down, the linking tube that connects the chambers in the EE. Images interval 5 seconds. Scale bar in [a] 1 mm.



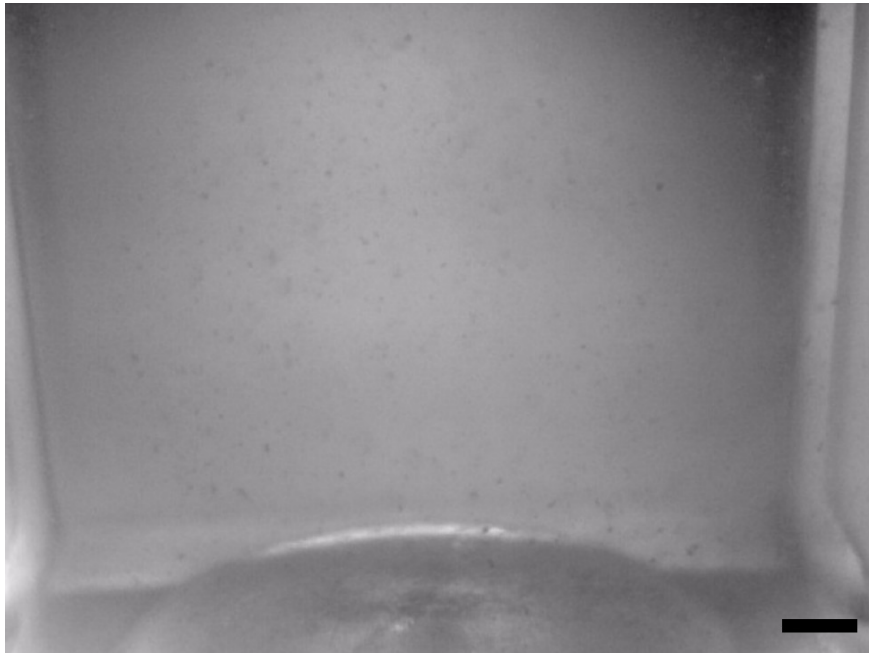

Figure 5: Photograph to show distribution of fixed *P. caudatum* cells inside an EE chamber. The cells have the appearance of particulates. Scale bar 1 mm.

### 224 2.3. Controlled retention and release

225 Extracellular FLPs were not identified in culture media until at least 24 hours had elapsed. Furthermore,  
226 organisms were observed to retain FLPs for up to 4 days post-exposure (data not shown), indicating that  
227 the organisms do not excrete them for the duration of their lifespan.

228 Fig. 5 shows the results of a representative experiment examining the deposition of fixed cells in an EE  
229 chamber: cells were found to fix rapidly and remain dispersed throughout the chamber, rather than settle  
230 to the bottom. Fluorescence microscopic examination of the culture media revealed no evidence of particles  
231 being released from cells as a result of fixation (i.e. autolysis was unlikely to have occurred).

### 232 2.4. Programmability

233 *P. caudatum* cells responded to multiple concurrent inputs as intended: cells were observed to migrate  
234 from chamber A→B in the manner described in chemotaxis experiments and consequently B→A when the  
235 DC field was applied. The number of cells that remained in the anodic chamber were similar to those seen  
236 in the galvanorepulsion experiments; again some cells (range 2–12) remained in the anodic chamber and/or  
237 remained within the link tube, but the majority of organisms migrated back towards the cathodic chamber  
238 in all experiments.

### 239 2.5. Automation

240 The fluorescence spectrometer device was found to be sensitive to a minimum of quantity of approximately  
241  $4.5 \times 10^4$  FLPs; increases or decreases in this quantity of particle equated to, at the least sensitive range  
242 of the sensor's operation, relative changes of 8.33 in a total range of 1024 (s.d. 1.24) (see Supplementary  
243 Information 3 for calibration dataset). A calibration curve for the spectrometer is shown in Fig. 6a and  
244 shows that the sensor's response was not linear, possibly due to the sensor beginning to saturate at higher  
245 concentrations of FLPs.

246 The spectrometer was less sensitive with regards to detecting cells loaded with FLPs but was able to  
247 detect a minimum of 200 cells per ml (i.e. approximately 400 organisms total) (Fig. 2b). Cells that

248 were examined post experiment revealed that the number of particles contained within each cell was highly  
249 variable, but was on average 161 (standard deviation 86, range 48–345) per cell (Fig. 7) (see Supplementary  
250 Information 3 for dataset).

### 251 3. Discussion

#### 252 3.1. Evaluation of devices

253 The basic EE was reasoned to be suitable for use as *P. caudatum* cells did not migrate freely between  
254 chambers within the time frame of device operation (<36 hours) without additional stimuli. Factors such  
255 as nutrient abundance in their original chamber and the confined geometry of the environment causing  
256 spontaneous alternation behaviour likely contributed to the organisms' propensity for not rapidly exploring  
257 their entire environment.

258 Observations on the amount of time *P. caudatum* took to migrate between chambers indicated that the  
259 presence of 'food' (yeast, MNP starch coatings) may dramatically increase the rate of the organisms' migra-  
260 tion between chambers; FLPs did not attract as strongly, despite their being eaten *en masse*. Particulate  
261 coating is therefore an attractive route towards increasing the rate of transport operations.

262 Galvanorepulsion was found to be a quick and effective method for controlling *P. caudatum* migration,  
263 but it suffered drawbacks stemming from the issues associated with passing a current through highly resistive  
264 fluid media. Significant 'fine tuning' was required in order to increase the power output to a level that would  
265 be effective across the length of the device without causing cells to rupture spontaneously in proximity to  
266 the electrodes. This phenomenon need not be a detriment in future iterations of such devices, however, as  
267 it could be used as a method of inducing particulate decellularisation and deposition, i.e. the cells are killed  
268 once they have completed migration.

269 *P. caudatum* retains ingested particulates long enough (> 24 hours) for transport operations to complete.  
270 Some progress was made towards controlled deposition, although the method used (chemical fixation) leaves  
271 cells suspended randomly in solution, does not release particulates from their cells and contaminates the EE.  
272 Furthermore, fixation precludes the use of fluorescence spectrometry after the deposition stage due aldehyde  
273 exposure inducing autofluorescence in biological tissues.

274 Regarding device programmability, whilst we demonstrated that the use of multimodal input is sufficient  
275 to complete several operations in one device, there is little room for continuous reprogramming or cascading  
276 of operations due to several processes (chemoattraction, deposition via killing the cells) being undynamic.  
277 Future work focusing on more dynamic stimuli, such as light, may therefore be productive.

278 The spectrometer was found to detect FLPs in minimum concentrations of approximately 50,000 and  
279 exceeding 180,000 in 2 ml of fluid. In comparison with the sensor readings for *P. caudatum* cells loaded  
280 with the FLPs, the minimum number of cells detected was 200 per ml (400 total): the mean relative sensor  
281 values for 200, 300 and 500 cells per ml were 4.4, 11.8 and 32.4 respectively, which equates to approximately  
282 100, 160 and 500 particles per cell, according to the calibration curve for free particles. Microscopic obser-  
283 vations of cells treated with FLPs, revealed that they ingest and retain highly variable quantities, indicating  
284 that calibration of the spectrometer against microscopically-determined values is essential for quantitative  
285 measurements. Factors such as uneven distribution of cells in their chambers, cell division:death ratios,  
286 cell density-mediated feeding rates and various fluorescence artefacts (autofluorescence, quenching etc.) all  
287 likely contribute to the discrepancy between calibration and experimental results.

288 Based on microscopic observations, we estimated the average mass transfer of FLPs by a *P. caudatum*  
289 cell to be about 14 mg/hour (0.68 g in 6 hours by 1000 cells in 4 ml total fluid volume) over a 5 mm distance,  
290 although this value is subject to significant error due to the variation in particle quantities ingested between  
291 organisms. Our other results indicate that this rate may be significantly increased if the particulates are  
292 made more 'palatable' for the cells.

#### 293 3.2. Device development and applications

294 Excluding hardware, optional components and the platinum wires (which could likely be replaced by  
295 cheaper alternatives), the unit cost for a single EE/spectrometer was approximately 65 GBP. This price

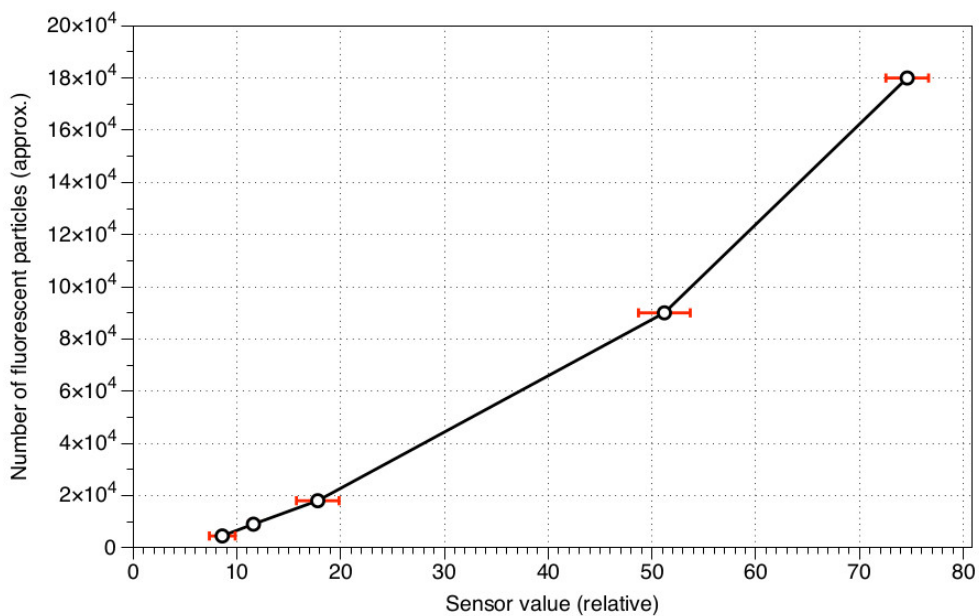

(a)

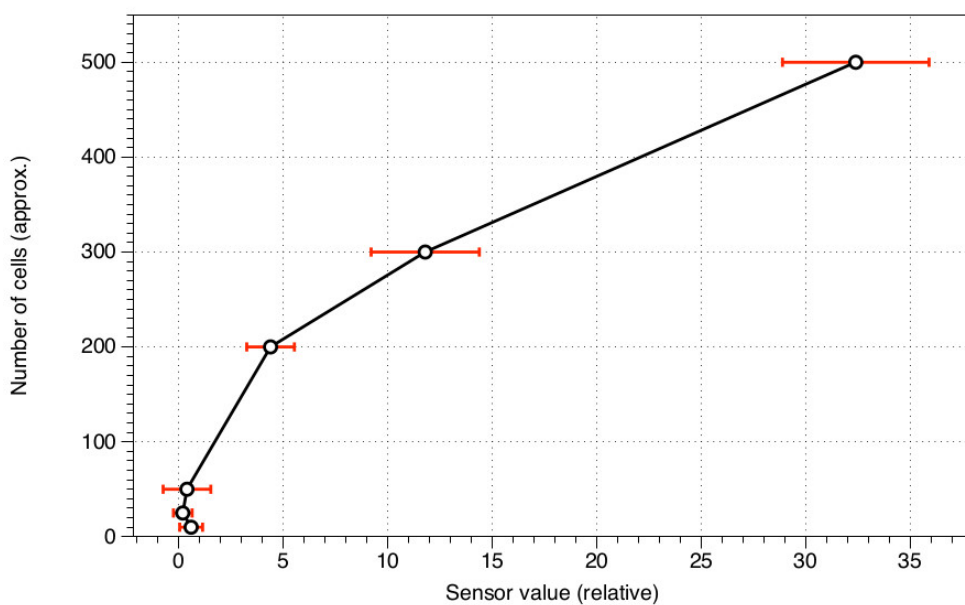

(b)

Figure 6: Charts to show spectrometer output. Error bars to 1 S.D. (a) Graduated concentration of FLP solution. (b) *P. caudatum* cells (per ml) loaded with FLPs.

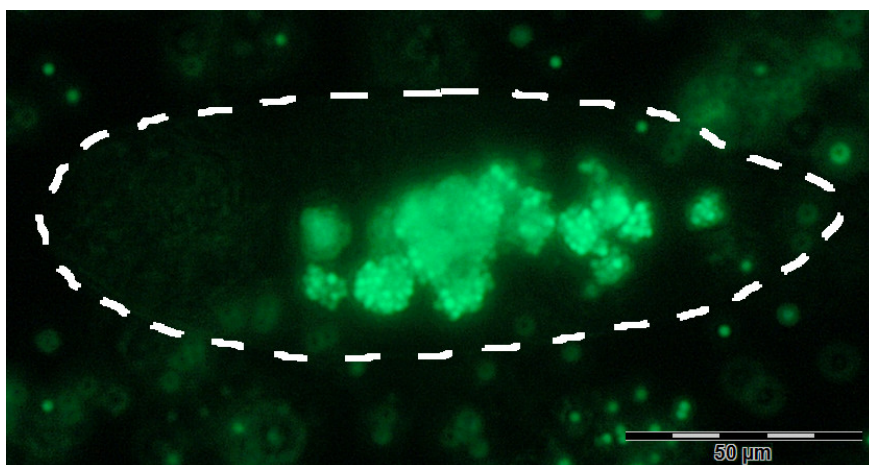

Figure 7: Fluorescence micrograph to show clusters of fluorescent particles inside intracellular vesicles of a fixed *P. caudatum* cell. The outline of the cell is highlighted.

296 was significantly cheaper than all commercially-available spectrometers we found via an internet search.  
297 Adaptations such as introduction of a second LED/filter set and optimising LDRs to specific wavelengths  
298 would be cheap and could increase the sensitivity and range of uses for these devices.

299 Further adaptations for increasing the ‘usefulness’ (modularity, scalability, parallelism etc.) of the devices  
300 presented here could include: further detectors, e.g. metal detection via a Hall effect sensor for metallic  
301 particulates or electrical capacitance measurement for cell movement; automated killing/lysis of cells via a  
302 microcontroller-driven chemical pump or large electrical current; use of further dynamic input types such  
303 as light and temperature.

304 We conceive the principle applications of cilia-mediated particle manipulation devices such as these  
305 to be in adaptive transport of microparticulates, especially in industries such as environmental clearance  
306 of polluting nano- and microscale inorganic objects (taking into consideration *P. caudatum*’s demonstrated  
307 tolerance to certain nanomaterials [31]), as well as micromixing/microfluidics. There is also scope to interpret  
308 these devices in terms of unconventional computing: if a third chamber (C) were introduced and input were  
309 applied to both A and B, the ‘output’ could be interpreted in terms of a logical TRUE if particulates are  
310 (or are not) delivered to C. Such a configuration could be interpreted as several varieties of gate (e.g. OR,  
311 NAND) driven by an automated bio-computer interface.

## 312 Acknowledgements

313 The work was supported by the Leverhulme Trust grant “Towards Artificial Paramecia” (grant number  
314 RPG-2013-345).

## 315 Appendix A. Supplementary Information

### 316 Appendix A.1. Key to SI files

317 **SI 1:** Video to show *P. caudatum* cells in an EE chamber, next to a platinum anode. The cells may be  
318 observed to rapidly enter the linking tube and migrate in the direction of the other chamber, which contains  
319 the cathode.

320 **SI 2:** Arduino sketch used for DIY fluorescence spectrometer.

321 **SI 3:** Spreadsheets showing spectrometer parts list, control experiments dataset, chemotaxis experiments  
322 dataset, spectrometer calibration data and intracellular fluorescent particle counts.

323 *Appendix A.2. Estimation of diffusion rate between EE chambers*

324 Simple diffusion between both chambers was estimated to take a minimum time of approximately 3 hours  
325 30 minutes: by Equation A.1

$$L^2 = 2DT \quad (\text{A.1})$$

326 Where L is length, D is the coefficient of diffusion (estimated at maximal rate of  $10^{-9}$  in liquids) and T  
327 is time, thus the time to diffuse 5 mm would be 12,500 seconds (208 minutes).

328 *Appendix A.3. Results of Control Experiments*

329 Results from initial experiments described in section 2.1 measuring the rate of diffusion of (a) *P. caudatum*  
330 cells between the two chambers in an absence of stimuli and (b) particulates between the two chambers are  
331 shown in Supplementary Information 3.

332 *Appendix A.4. Results of Chemotaxis Experiments*

333 Dataset in Supplementary Information 3 shows results referenced in section 2.2.1, indicating the time  
334 taken for *P. caudatum* cells to traverse the linking tube between chambers in their EE to begin feeding on  
335 the supplied particulate ‘foods’.

336 *Appendix A.5. Estimation of transferred particulate mass*

337 The approximate mass of a single latex particle was calculated by the mean volume of a 2  $\mu\text{m}$  latex  
338 sphere multiplied by the manufacturer-specified density, is shown in equation A.2.

$$4 \times 10^{-6} \times 1.045 = 4.18 \times 10^{-6} \text{ g} \quad (\text{A.2})$$

339 Multiplied by the average number of particles per cell as reported in section 2.5, 163 (range 48–345), we  
340 estimate the mass transfer of FLPs by *P. caudatum* cells to be  $6.81 \times 10^{-4}$  g ( $2.00 \times 10^{-4}$ – $1.44 \times 10^{-3}$ g) per  
341 operation, over 6 hours (as per the experiment detailed in section 1.5). This equates to an estimated total  
342 mass transfer of 0.68 g (0.20–1.44 g) for the maximum cell densities that were tested (1000 in 2 ml).

343 **References**

- 344 [1] M. Sleight, Coordination of the rhythm of beat in some ciliary systems, *International review of cytology* 25 (1969) 31–54.  
345 [2] H. Machemer, Ciliary activity and the origin of metachrony in paramecium: effects of increased viscosity, *Journal of*  
346 *Experimental Biology* 57 (1) (1972) 239–259.  
347 [3] H. Machemer, Interactions of membrane potential and cations in regulation of ciliary activity in paramecium, *Journal of*  
348 *Experimental Biology* 65 (2) (1976) 427–448.  
349 [4] M. Jorissen, B. der Schueren Van, J. Tyberghein, H. der Berghe Van, J.-J. Cassiman, Ciliogenesis and coordinated ciliary  
350 beating in human nasal epithelial cells cultured in vitro., *Acta oto-rhino-laryngologica Belgica* 43 (1) (1989) 67–73.  
351 [5] K.-I. Okamoto, Y. Nakaoka, Reconstitution of metachronal waves in ciliated cortical sheets of paramecium-asymmetry of  
352 the ciliary movements, *Journal of experimental biology* 192 (1) (1994) 73–81.  
353 [6] S. M. Mitran, Metachronal wave formation in a model of pulmonary cilia, *Computers & structures* 85 (11) (2007) 763–774.  
354 [7] J. Hussong, W.-P. Breugem, J. Westerweel, A continuum model for flow induced by metachronal coordination between  
355 beating cilia, *Journal of Fluid Mechanics* 684 (2011) 137–162.  
356 [8] J. Elgeti, G. Gompper, Emergence of metachronal waves in cilia arrays, *Proceedings of the National Academy of Sciences*  
357 110 (12) (2013) 4470–4475.  
358 [9] A. N. Sarvestani, A. Shamloo, M. T. Ahmadian, Simulation of paramecium, *Cell biochemistry and biophysics* 74 (2) (2016)  
359 241–252.  
360 [10] B. Nasouri, G. J. Elfring, Hydrodynamic interactions of cilia on a spherical body, *Physical Review E* 93 (3) (2016) 033111.  
361 [11] C. L. Van Oosten, C. W. Bastiaansen, D. J. Broer, Printed artificial cilia from liquid-crystal network actuators modularly  
362 driven by light, *Nature materials* 8 (8) (2009) 677–682.  
363 [12] J. den Toonder, F. Bos, D. Broer, L. Filippini, M. Gillies, J. de Goede, T. Mol, M. Reijme, W. Talen, H. Wilderbeek,  
364 et al., Artificial cilia for active micro-fluidic mixing, *Lab on a Chip* 8 (4) (2008) 533–541.  
365 [13] M. Vilfan, A. Potočnik, B. Kavčič, N. Osterman, I. Poberaj, A. Vilfan, D. Babič, Self-assembled artificial cilia, *Proceedings*  
366 *of the National Academy of Sciences* 107 (5) (2010) 1844–1847.  
367 [14] F. Fahrni, M. W. Prins, L. J. van IJendoorn, Micro-fluidic actuation using magnetic artificial cilia, *Lab on a Chip* 9 (23)  
368 (2009) 3413–3421.

- 369 [15] S. Khaderi, C. Craus, J. Hussong, N. Schorr, J. Belardi, J. Westerweel, O. Prucker, J. Rhe, J. Den Toonder, P. Onck,  
370 Magnetically-actuated artificial cilia for microfluidic propulsion, *Lab on a Chip* 11 (12) (2011) 2002–2010.
- 371 [16] J. Hussong, N. Schorr, J. Belardi, O. Prucker, J. Rhe, J. Westerweel, Experimental investigation of the flow induced by  
372 artificial cilia, *Lab on a Chip* 11 (12) (2011) 2017–2022.
- 373 [17] S. Sareh, J. Rossiter, A. Conn, K. Drescher, R. E. Goldstein, Swimming like algae: biomimetic soft artificial cilia, *Journal*  
374 *of the Royal Society Interface* (2012) rsif20120666.
- 375 [18] C.-Y. Chen, C.-Y. Chen, C.-Y. Lin, Y.-T. Hu, Magnetically actuated artificial cilia for optimum mixing performance in  
376 microfluidics, *Lab on a Chip* 13 (14) (2013) 2834–2839.
- 377 [19] C.-Y. Chen, T.-C. C. Chien, K. Mani, H.-Y. Tsai, Axial orientation control of zebrafish larvae using artificial cilia,  
378 *Microfluidics and nanofluidics* 20 (1) (2016) 12.
- 379 [20] S. Zhang, Y. Wang, J. den Toonder, Micro-moulded magnetic artificial cilia for anti-fouling surfaces.
- 380 [21] T. Masuda, A. M. Akimoto, K. Nagase, T. Okano, R. Yoshida, Artificial cilia as autonomous nanoactuators: Design of a  
381 gradient self-oscillating polymer brush with controlled unidirectional motion, *Science advances* 2 (8) (2016) e1600902.
- 382 [22] S. Hanasoge, M. Ballard, P. J. Hesketh, A. Alexeev, Asymmetric motion of magnetically actuated artificial cilia, *Lab on*  
383 *a Chip* 17 (18) (2017) 3138–3145.
- 384 [23] S. Skachek, A. Adamatzky, C. Melhuish, Manipulating objects by discrete excitable media coupled with contact-less  
385 actuator array: Open-loop case, *Chaos, Solitons & Fractals* 26 (5) (2005) 1377–1389.
- 386 [24] I. Georgilas, A. Adamatzky, D. Barr, P. Dudek, C. Melhuish, Metachronal waves in cellular automata: Cilia-like manipu-  
387 lation in actuator arrays, in: *Nature Inspired Cooperative Strategies for Optimization (NICSO 2013)*, Springer, 2014, pp.  
388 261–271.
- 389 [25] J. G. Whiting, R. Mayne, C. Melhuish, A. Adamatzky, A cilia-inspired closed-loop sensor-actuator array, *Bionic Engi-*  
390 *neering in press*.
- 391 [26] R. Mayne, J. G. Whiting, G. Wheway, C. Melhuish, A. Adamatzky, Particle Sorting by Paramecium Cilia Arrays, *Biosys-*  
392 *tems* 156-157 (2017) 46–52. doi:10.1016/j.biosystems.2017.04.001.
- 393 [27] A. Adamatzky, Manipulating substances with physarum polycephalum, *Materials Science and Engineering: C* 30 (8)  
394 (2010) 1211–1220.
- 395 [28] T. Fenchel, Suspension Feeding in, Ciliated Protozoa: Structure and Function of Feeding Organelles, *Archiv fr Protis-*  
396 *tenkunde* 123 (3) (1980) 239–260. doi:10.1016/S0003-9365(80)80009-1.
- 397 [29] T. Fenchel, Suspension Feeding in Ciliated Protozoa : Functional Response and Particle Size Selection, *Microbial Ecology*  
398 6 (1980) 1–11.
- 399 [30] T. Fenchel, Relation between particle size selection and clearance in suspension feeding ciliates, *Limnology & Oceanography*  
400 25 (4) (1980) 733–738.
- 401 [31] R. Mayne, J. Whiting, A. Adamatzky, Toxicity and applications of internalised magnetite nanoparticles within live Parame-  
402 cium caudatum cells, *BioNanoScience* doi:10.1007/s12668-017-0425-z.
- 403 [32] R. Witcherman, *The biology of Paramecium*, Plenum, 1986, Ch. 3.
- 404 [33] Thingiverse Website, Cuvette holder, Available at <https://www.thingiverse.com/thing:1515039>, uploaded by user  
405 ‘bobthechemist’.
- 406 [34] A. Maia Chagas, L. Prieto Godino, A. B. Arrenberg, T. Baden, The 100 Euro Lab: A 3-D Printable Open Source  
407 Platform For Fluorescence Microscopy, Optogenetics And Accurate Temperature Control During Behaviour Of Zebrafish,  
408 *Drosophila And C. elegans*, *PLoS ONE* 15 (7). doi:10.1371/journal.pbio.2002702.
